# Supplementary material for: Irradiation alters the structure and reduces the sensitization of sesame proteins in the liquid state
Source: Royal Society of Chemistry journal article supplement (doi:10.1039/d4fo05355a), 2025-01-01
Supplement: d4fo05355a1.pdf [file d4fo05355a1.pdf]

Supplementary:

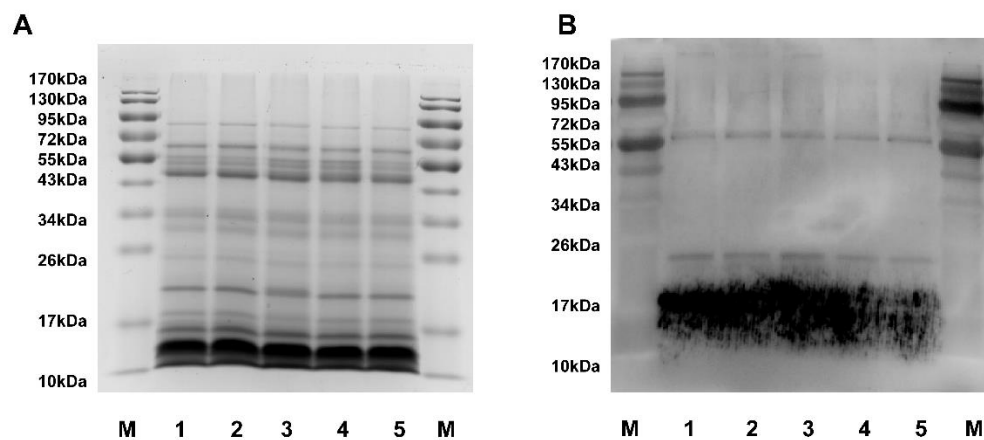

S1: Potential allergenicity assessment on small molecular weight SSP irradiated at various doses by immunoblotting. (A) SSP under different doses of irradiation ;(B) WB analysis of sera from sesame-allergic patients against irradiated SSP. (M : marker ; 1-5: 0, 2.5, 5, 7.5, and 10 kGy, respectively)
